# Supplementary material
Source: publisher site journal article supplement (https://www.dovepress.com/article/293180)

**Supplementary Figure 1. The representative images of Figure 4.** (A) The representative images of Figure 4A. (B) The representative images of Figure 4B. (C) The representative images of Figure 4C. (D) The representative images of Figure 4E.


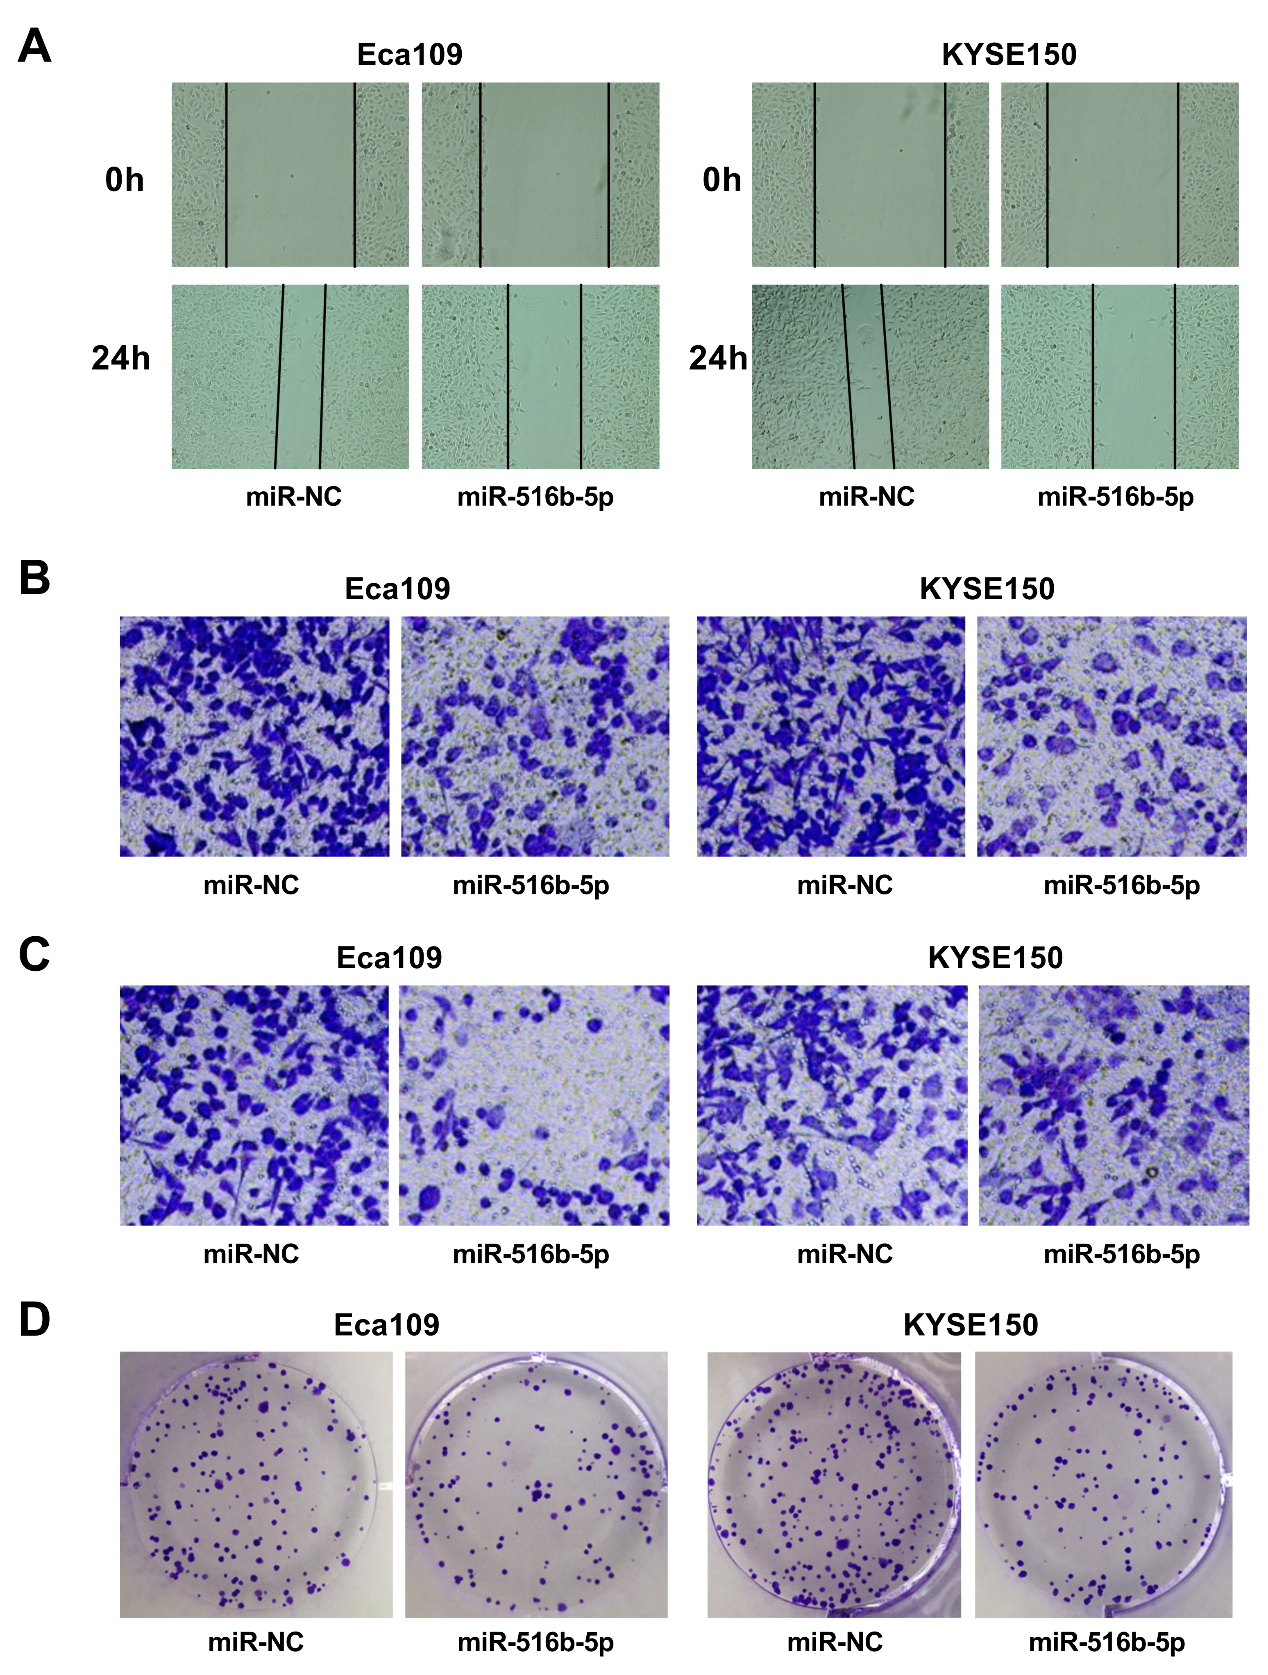


**Supplementary Figure 2. The representative images of Figure 7.** (A) The representative images of Figure 7B. (B) The representative images of Figure 7C. (C) The representative images of Figure 7D. (D) The representative images of Figure 7F.


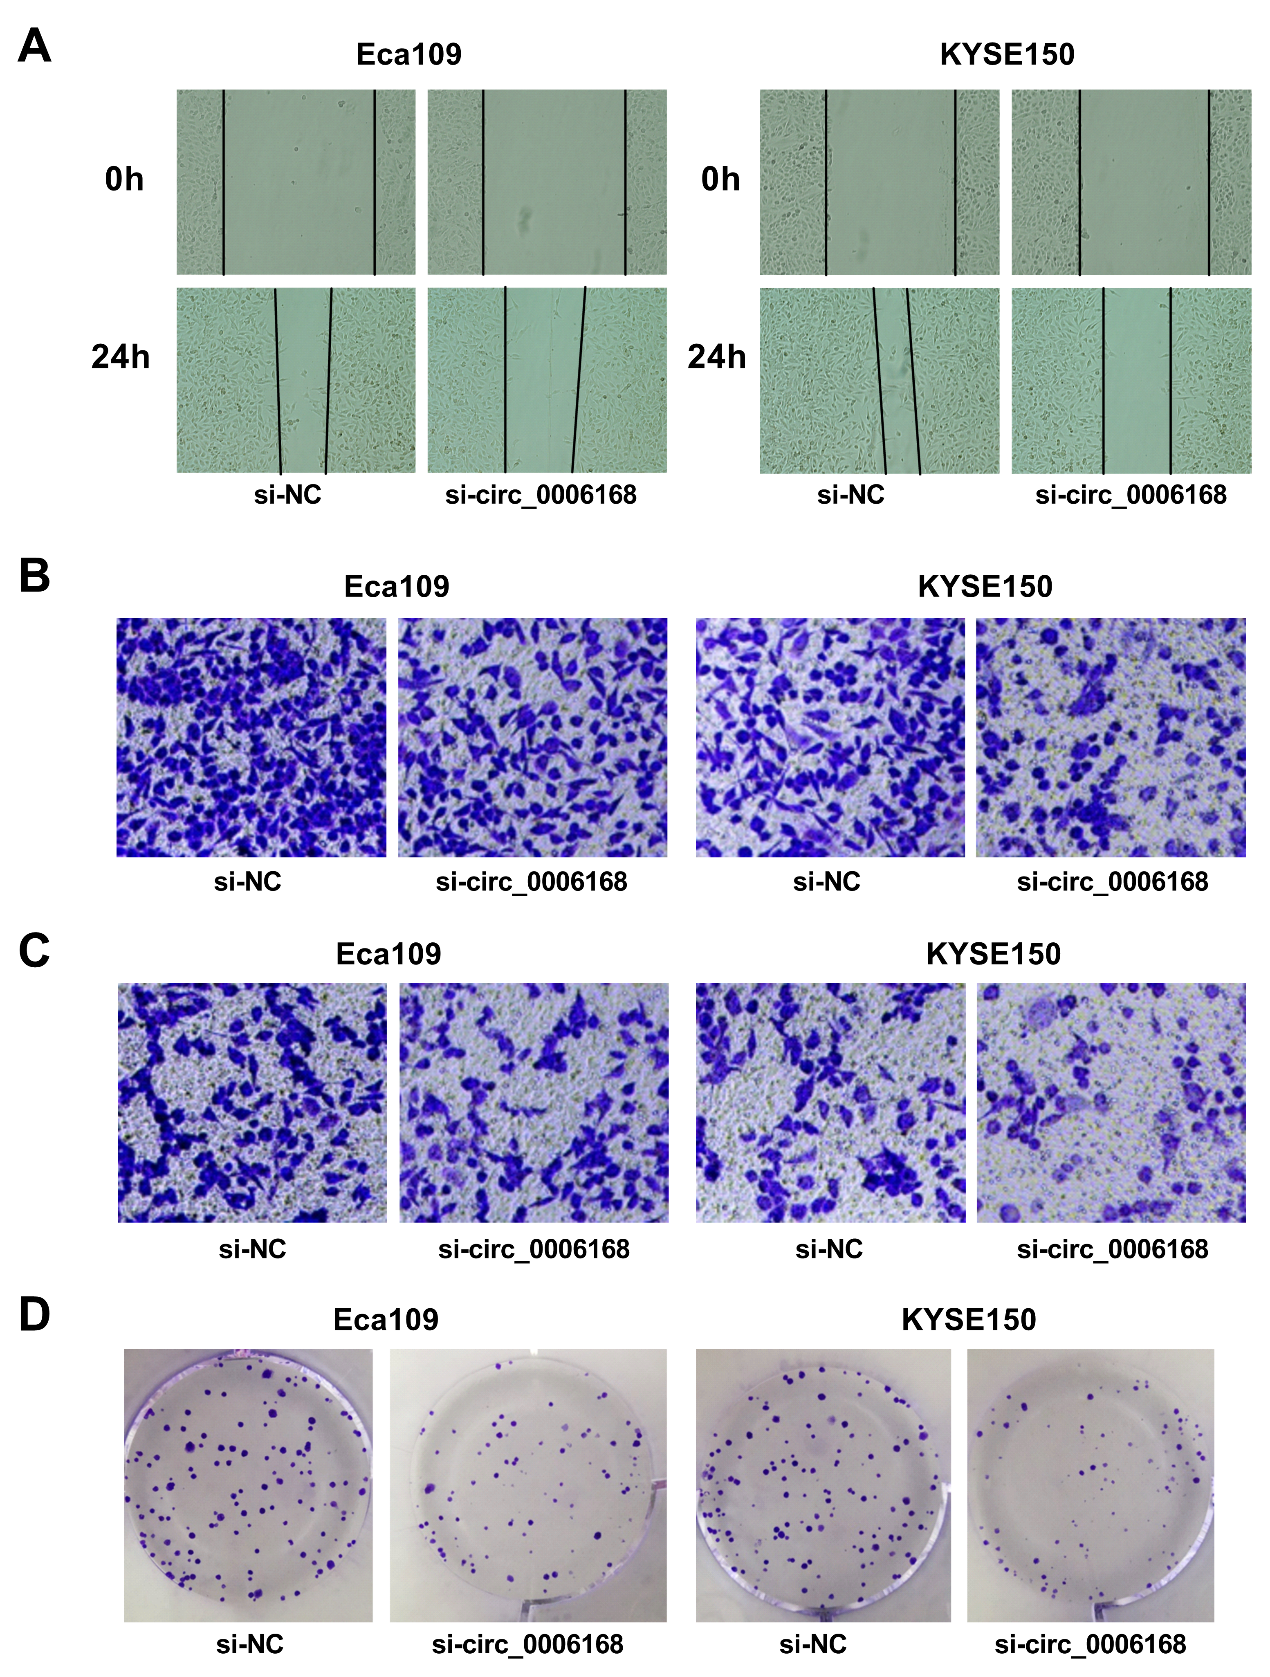


**Supplementary Figure 3. The representative images of Figure 9.** (A) The representative images of Figure 9A. (B) The representative images of Figure 9B. (C) The representative images of Figure 9C. (D) The representative images of Figure 9E.


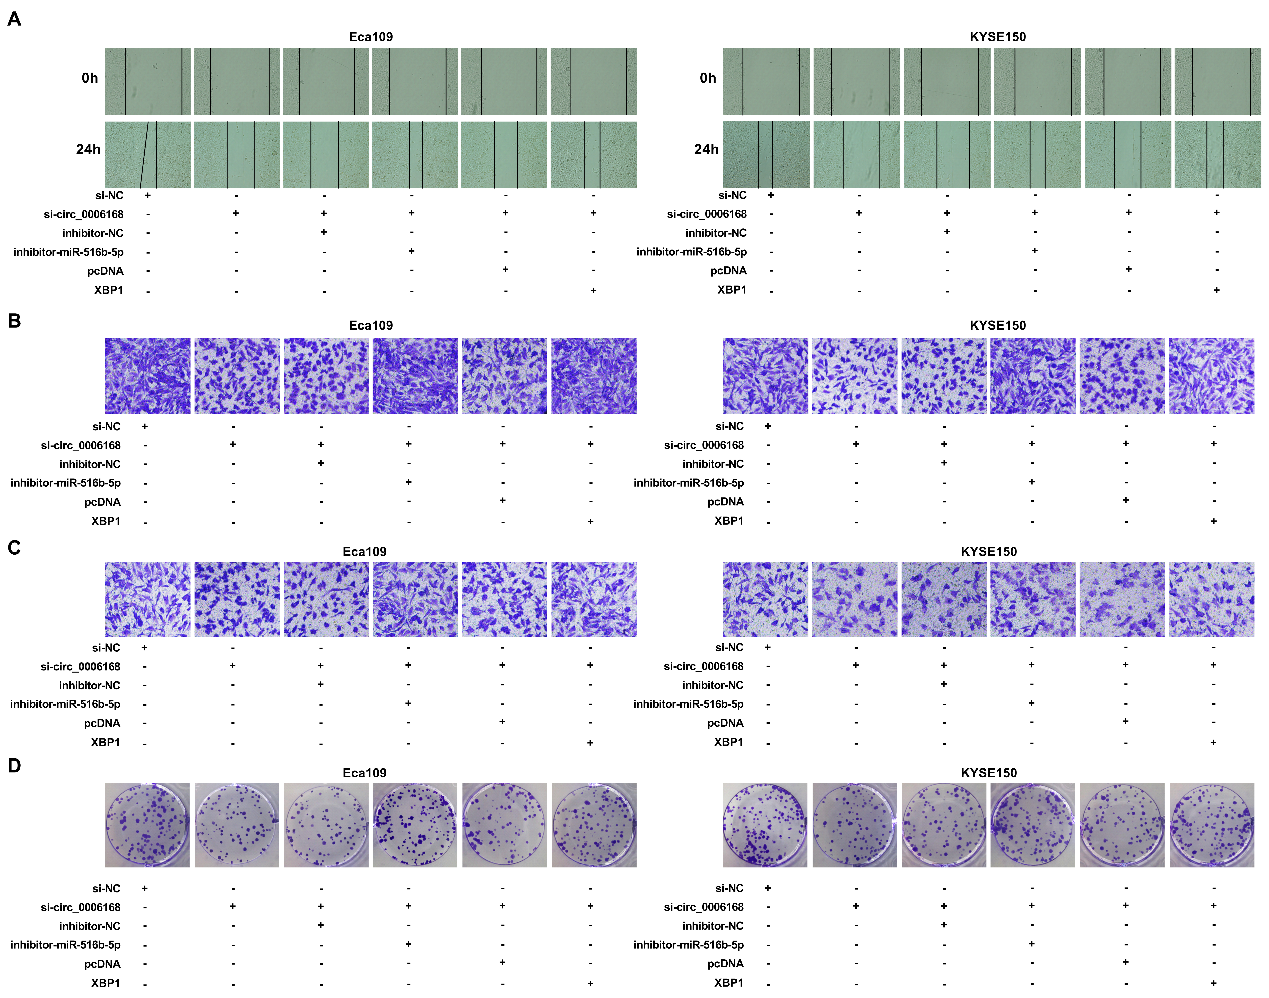

Supplement: Supplementary file 1 [file get_supplementary_file.php]
